# Supplementary material
Source: PubMed Central journal article supplement (PMC4963013)
Supplement: NIHMS762106-supplement-Supplement.pdf [file NIHMS762106-supplement-Supplement.pdf]

# ADVANCED FUNCTIONAL MATERIALS

## Supporting Information

for *Adv. Funct. Mater.*, DOI: 10.1002/adfm.201503838

**Label-Free and Continuous-Flow Ferrohydrodynamic  
Separation of HeLa Cells and Blood Cells in Biocompatible  
Ferrofluids**

*Wujun Zhao, Taotao Zhu, Rui Cheng, Yufei Liu, Jian He,  
Hong Qiu, Lianchun Wang, Tamas Nagy, Troy D. Querec,  
Elizabeth R. Unger, and Leidong Mao\**

## Supporting Information

**Title: Label-Free and Continuous-Flow Ferrohydrodynamic Separation of HeLa Cells and Blood Cells in Biocompatible Ferrofluids**

*Wujun Zhao, Taotao Zhu, Rui Cheng, Yufei Liu, Jian He, Hong Qiu, Lianchun Wang, Tamas Nagy, Troy D. Querec, Elizabeth R. Unger, and Leidong Mao\**

W. Zhao<sup>†</sup>, Dr. T. Zhu<sup>†</sup>  
Department of Chemistry, The University of Georgia, Athens, Georgia 30602, USA

R. Cheng, Prof. L. Mao  
College of Engineering, The University of Georgia, 220 Riverbend Road, Room 166, Athens, Georgia 30602, USA  
E-mail: mao@uga.edu

Y. Liu, Prof. J. He  
Department of Physics and Astronomy, Clemson University, Clemson, South Carolina 29634, USA

Dr. H. Qiu, Prof. L. Wang  
Department of Biochemistry and Molecular Biology, Complex Carbohydrate Research Center, The University of Georgia, Athens, Georgia 30602, USA

Prof. T. Nagy  
Department of Pathology, College of Veterinary Medicine, The University of Georgia, Athens, Georgia 30602, USA

Dr. T. D. Querec, Dr. E. R. Unger  
Chronic Viral Diseases Branch, Division of High-Consequence Pathogens and Pathology, National Center for Emerging and Zoonotic Infectious Diseases Pathology, Centers for Disease Control and Prevention, Atlanta, Georgia 30329, USA

<sup>†</sup>Contributed equally to this work.

**Control experiments**

$2 \times 10^6$  HeLa cells and  $2 \times 10^6$  mouse blood cells suspended in 1 mL ferrofluid were pumped into microchannel respectively while magnetic fields were present using same conditions as separation experiments. The same concentration of HeLa cells, mouse blood cells and mixtures were also introduced into microchannel respectively at same conditions while magnetic fields were not applied. Unseparated HeLa cells, blood cells and mixtures either in 1 mL ferrofluid or 1 mL Hank's Balanced Salt Solution (HBSS, without calcium and magnesium; Sigma-Aldrich, St. Louis, MO, USA) were prepared at room temperature as cytopins and stained by Hematoxylin and Eosin (H&E) for controls (**Figure S2**).

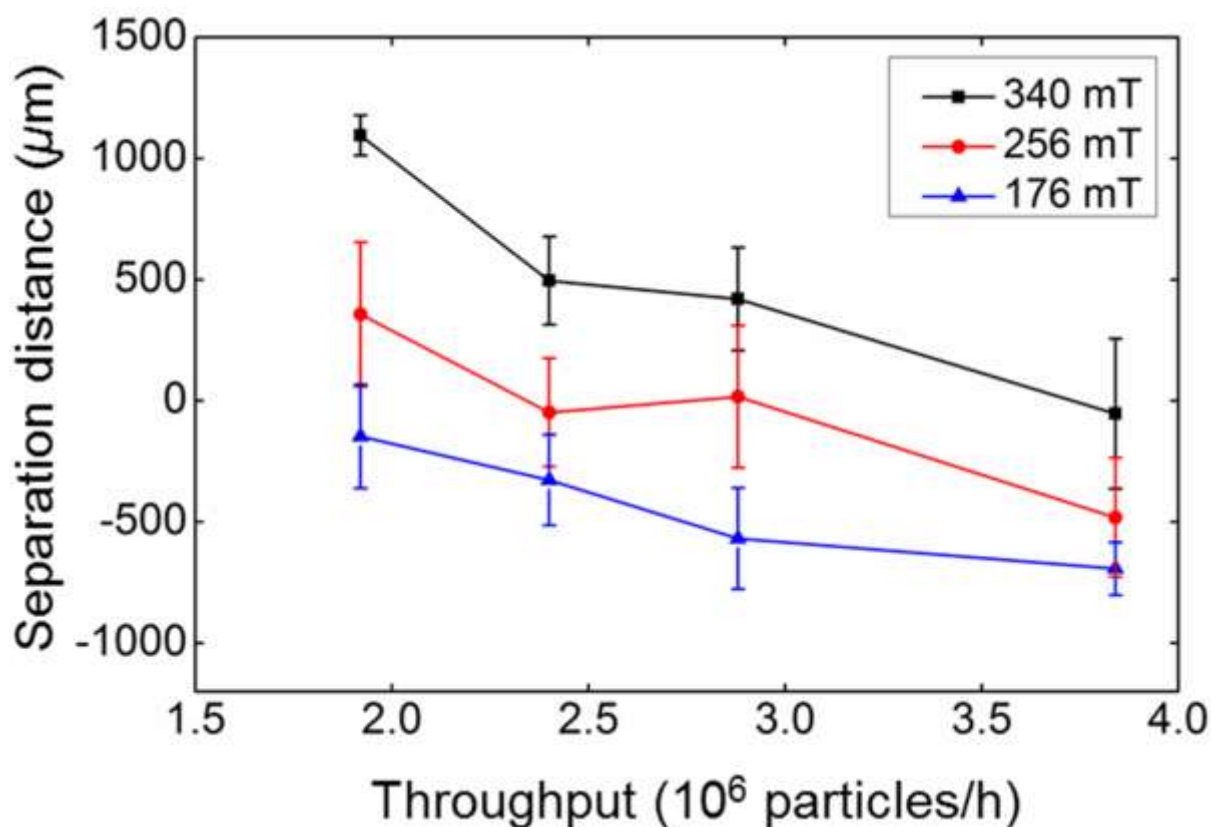

**Figure S1.** Separation distance as a function of throughput and magnetic fields when the magnet was placed 1, 2 and 3 mm away from the microchannel, respectively. Error bars are from 3 repeats of experiments. A flow rate of  $8 \mu\text{L}\cdot\text{min}^{-1}$  at Inlet A corresponded to a throughput of  $1.92 \times 10^6$  particles $\cdot\text{h}^{-1}$ ;  $16 \mu\text{L}\cdot\text{min}^{-1}$  corresponded to  $3.84 \times 10^6$  particles $\cdot\text{h}^{-1}$ . Mean magnetic field strengths were 340, 256 and 176 mT, and mean magnetic field gradient were 97, 82 and  $56 \text{ T}\cdot\text{m}^{-1}$ , when the magnet was placed 1, 2 and 3 mm away from the microchannel, respectively. Closer distance between the magnet and channel resulted in higher magnetic field strength and gradient, which in turn led to larger separation distance between the two microparticle streams at the end of channel. Meanwhile, the lower throughput also resulted in larger separation distance due to the longer experiencing time of microparticle separation in the channel. At a flow rate of  $8 \mu\text{L}\cdot\text{min}^{-1}$  and a magnetic field flux density of 340 mT, separation distance was approximately  $1100 \mu\text{m}$ . On the contrary, at a flow rate of  $16 \mu\text{L}\cdot\text{min}^{-1}$  and a magnetic field flux density of 176 mT, separation distance was approximately  $600 \mu\text{m}$ , indicating an overlap between two microparticle streams at the end of channel.

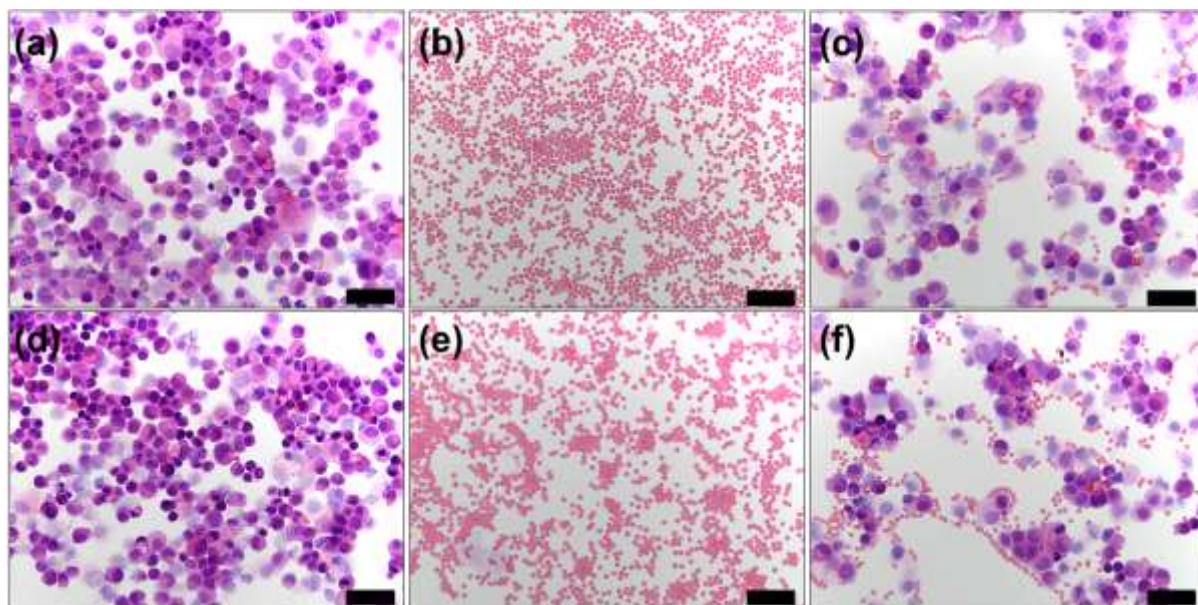

**Figure S2.** Hematoxylin and Eosin (H&E) stain of cytopins of unseparated HeLa, blood cells and mixtures in ferrofluid and Hank's Balanced Salt Solution (HBSS). (a)-(c) HeLa cells, blood cells and mixtures in ferrofluid, respectively. (d)-(f) HeLa cells, blood cells and mixtures in HBSS, respectively. Scale bars represent 50  $\mu\text{m}$ .

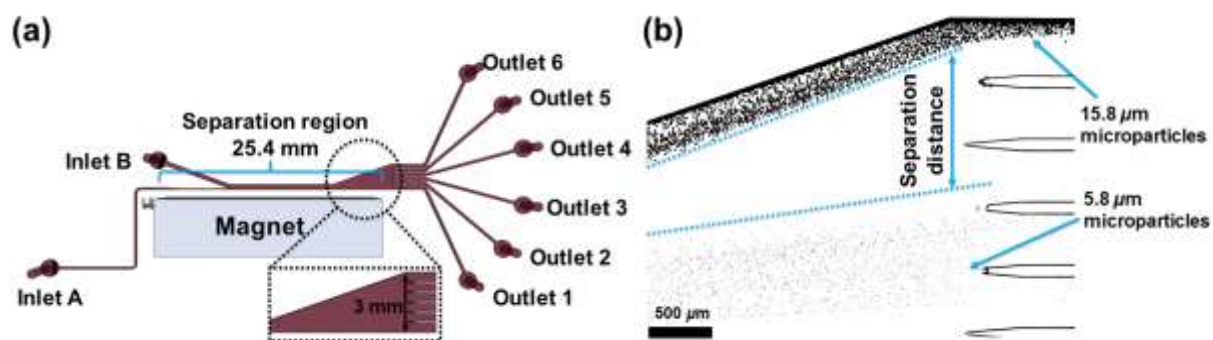

**Figure S3.** (a) Configuration of the microfluidic device. The vertical separation distance was measured at the 3 mm wide section of the channel. (b) Separation distance between 15.8  $\mu\text{m}$  and 5.8  $\mu\text{m}$  microparticle streams.
